# Supplementary material for: Novel TPR-containing subunit of TOM complex functions as cytosolic receptor for Entamoeba mitosomal transport
Source: PubMed Central journal article supplement — Sci Rep. 2013 Jan 24;3:1129. doi: 10.1038/srep01129 (PMC3553487; doi:10.1038/srep01129), 2013-01-24
Supplement: srep01129-s1.pdf [file srep01129-s1.pdf]

**Supplementary Information:**

**Novel TPR-containing subunit of TOM complex functions as cytosolic receptor for *Entamoeba* mitosomal transport**

Takashi Makiuchi <sup>a,b</sup>, Fumika Mi-ichi <sup>a,1</sup>, Kumiko Nakada-Tsukui <sup>a</sup>, and Tomoyoshi Nozaki <sup>a,c,\*</sup>

<sup>a</sup> Department of Parasitology, National Institute of Infectious Diseases, 1-23-1 Toyama, Shinjuku-ku, Tokyo 162-8640, Japan; <sup>b</sup> Kitasato Institute for Life Sciences and Graduate School of Infection Control Sciences, Kitasato University, Minato-ku, Tokyo 108-8641, Japan; <sup>c</sup> Graduate School of Life and Environmental Sciences, University of Tsukuba, 1-1-1 Tennodai, Tsukuba, Ibaraki 305-8572, Japan

<sup>1</sup> Current address: Department of Biomolecular Sciences, Faculty of Medicine, Saga University, 5-1-1 Nabeshima, Saga 849-8501, Japan

\* Corresponding author: T. Nozaki

E-mail: nozaki@nih.go.jp; Phone: +81(Japan)-3-4582-2690; Fax: +81-3-5285-1219

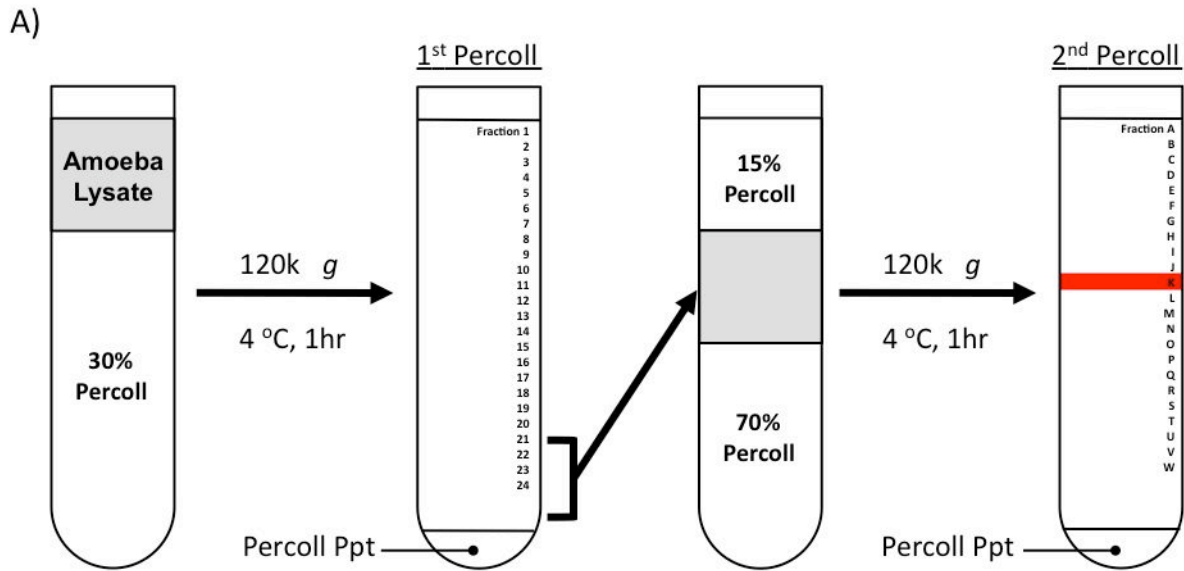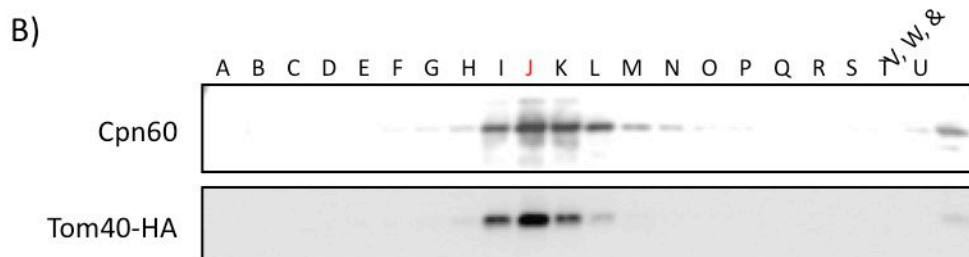

**Supplementary Figure S1: Fractionation of mitosomes from the *E. histolytica* trophozoites expressing Tom40-HA.** **A**, A scheme of mitosome purification by the Percoll gradient centrifugation, as previously described<sup>1</sup>. **B**, Immunoblot analysis of the fractions after the second Percoll gradient ultracentrifugation. Approximately 9- $\mu$ l of each fraction was subjected to SDS-PAGE and immunoblot analyses with anti-Cpn60 and anti-HA antibody.

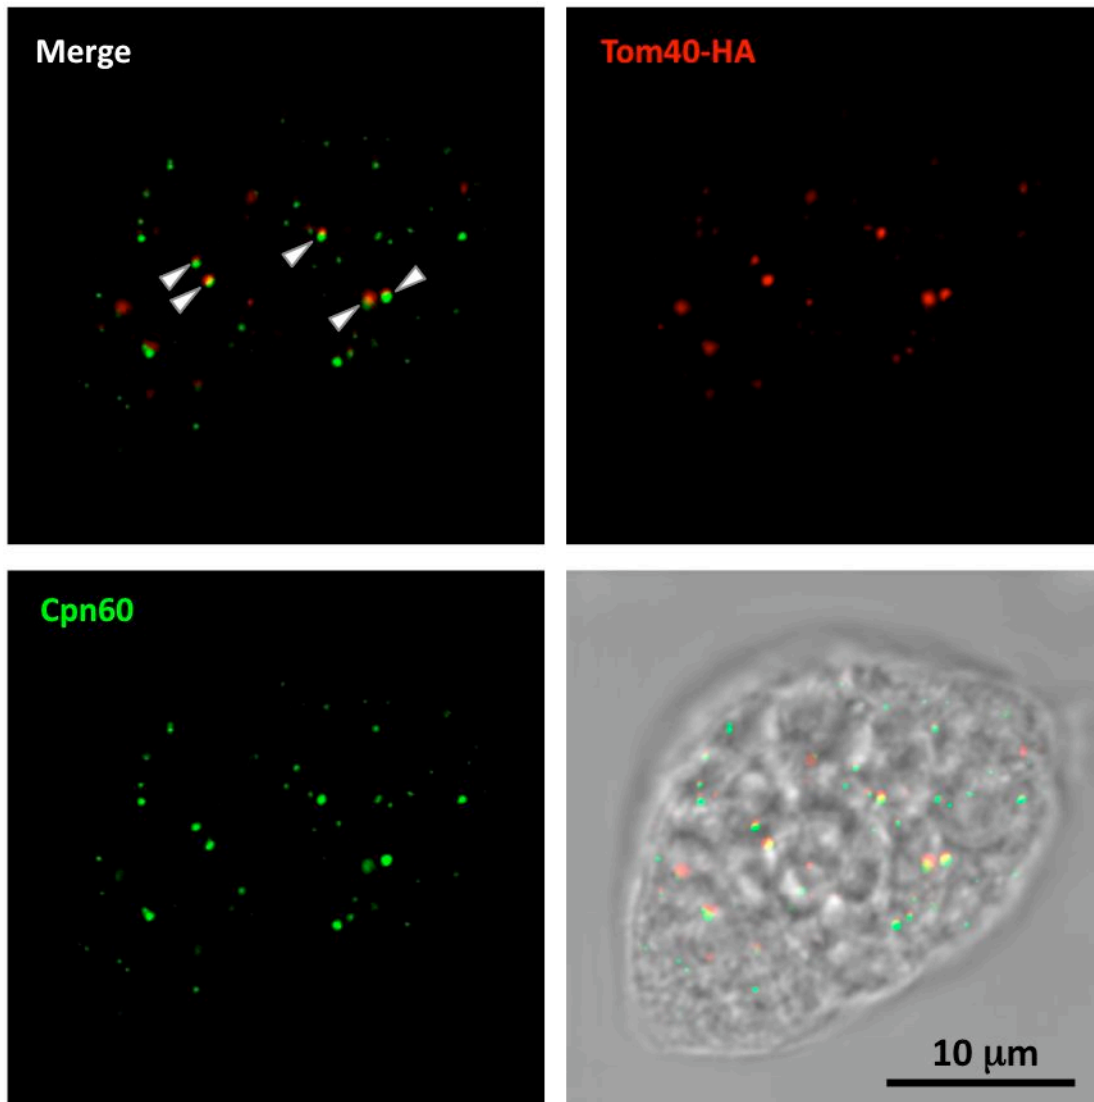

**Supplementary Figure S2: Immunofluorescence analysis of Tom40-HA in *E. histolytica*.** The samples were prepared and examined as previously described<sup>1</sup>. Arrowheads indicate the mitosomes where Cpn60 and Tom40-HA are co-localized.

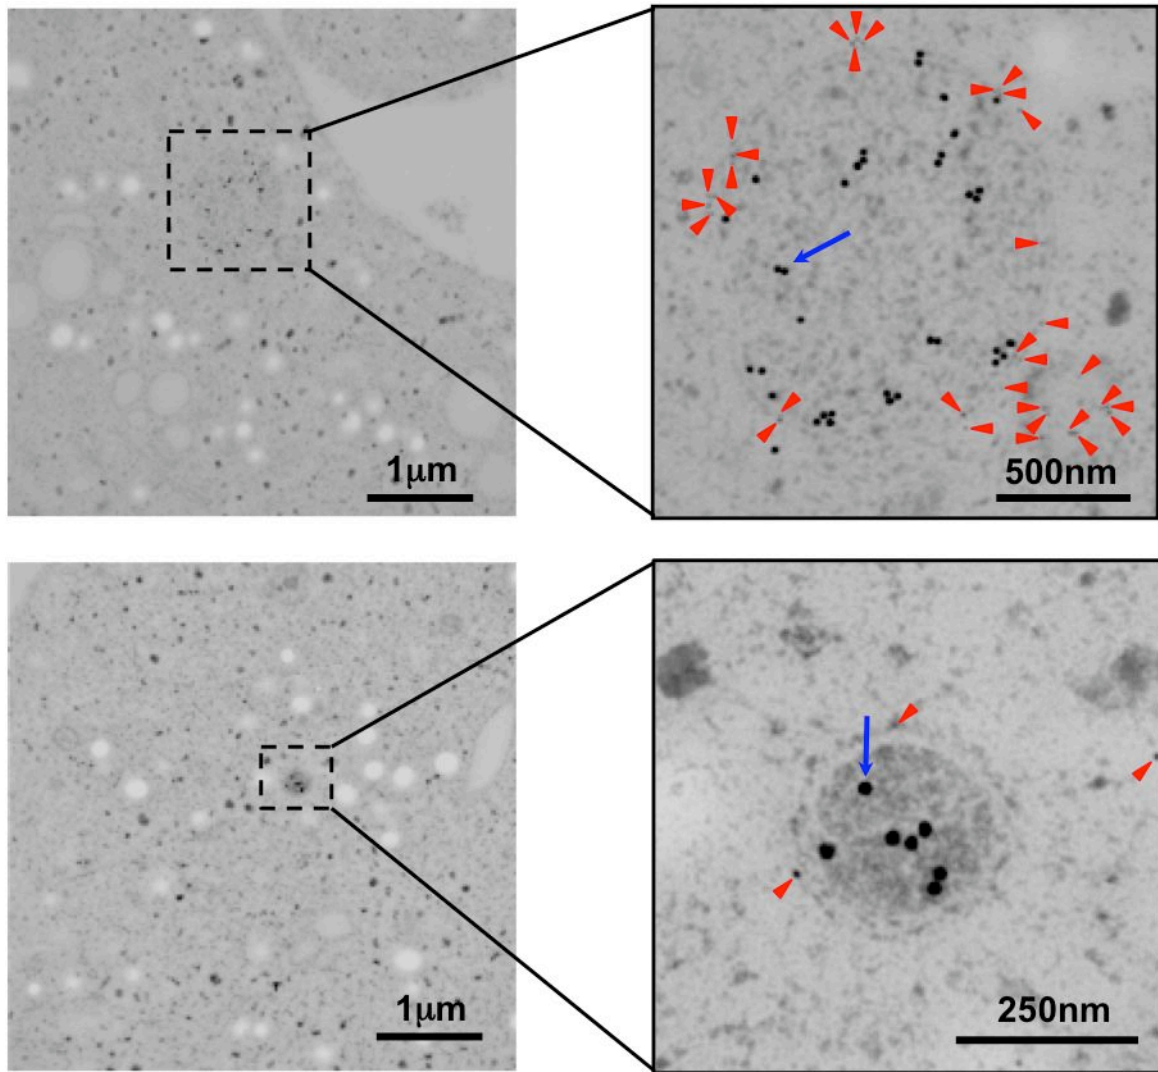

**Supplementary Figure S3: Immuno-EM analysis of Tom40-HA in *E. histolytica*.** The samples were prepared as previously described<sup>4,5</sup> and examined by electron microscopy at Tokai Microscopy, Inc (Nagoya, JAPAN). Large (20 nm; blue arrows) and small gold particles (10 nm; red arrowheads) indicate Cpn60 and Tom40-HA, respectively.



the OCTOPUS (<http://octopus.cbr.su.se/>), and the SOSUI (<http://bp.nuap.nagoya-u.ac.jp/sosui/>) programs. However, the HMMTOP (<http://www.enzim.hu/hmmtop/>) program indicated that *E. histolytica* and *E. dispar* Tom60s have one transmembrane helix at the amino terminus. These proteins were also predicted to possess no signal peptide by the SignalP (<http://www.cbs.dtu.dk/services/SignalP/>) program. The double-underlined region indicates the polypeptide detected by LC-MS/MS analysis in both the 60kD band of the 600 kDa complex immunoprecipitated from the Tom40-HA lysates (Fig. 1c and Supplementary Table S1A) and the band corresponding with the 600 kD complex (Supplementary Table S1B). The single-underlined region indicates the polypeptide detected only in the 600kD complex immunoprecipitated (Supplementary Fig. S5 and Supplementary Table S1B).

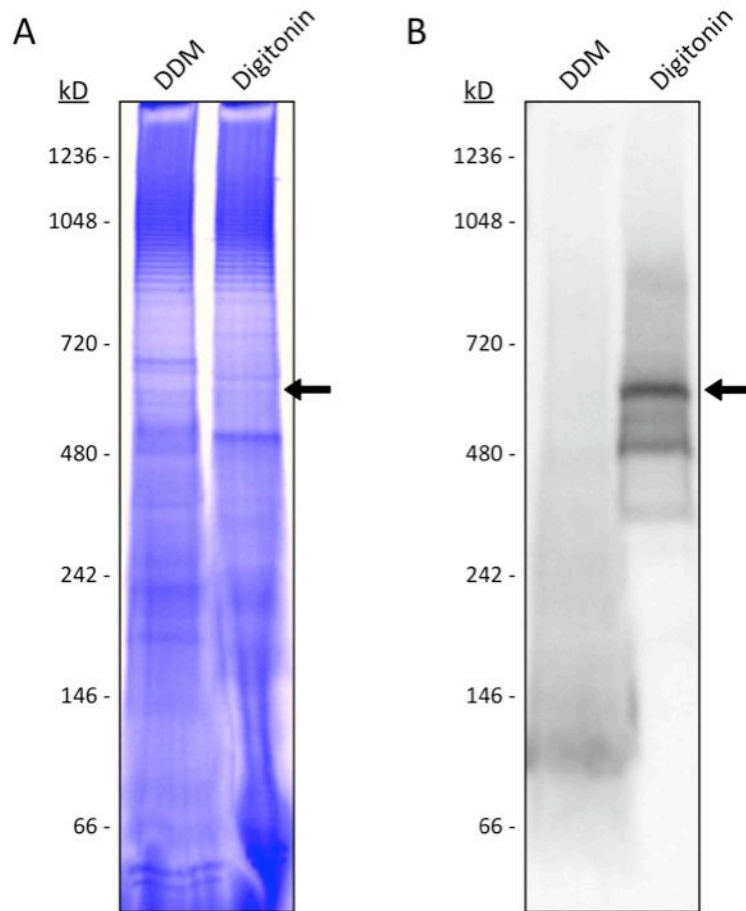

**Supplementary Figure S5: BN-PAGE and immunoblot analyses of *E. histolytica* trophozoites expressing Tom40-HA.** **A**, Coomassie brilliant blue-stained gels of BN-PAGE analysis. The  $100,000 \times g$  organelle fraction (60 mg) was solubilized with 2% digitonin or 2% n-dodecyl-b-D-maltoside (DDM), and subjected to BN-PAGE analysis. After the electrophoresis, the gel was stained with 0.1% Coomassie brilliant blue R-350. **B**, Immunoblot analysis. When the fraction was solubilized by 2% DDM, the specific 600 kD band (arrows) was not detected. The specific 600 kD band detected in the digitonin-solubilized sample was subjected to LC-MS/MS analysis. The specific *E. histolytica* polypeptides detected in only the digitonin sample by LC-MS/MS analysis are described in the Supplementary Table S1B.

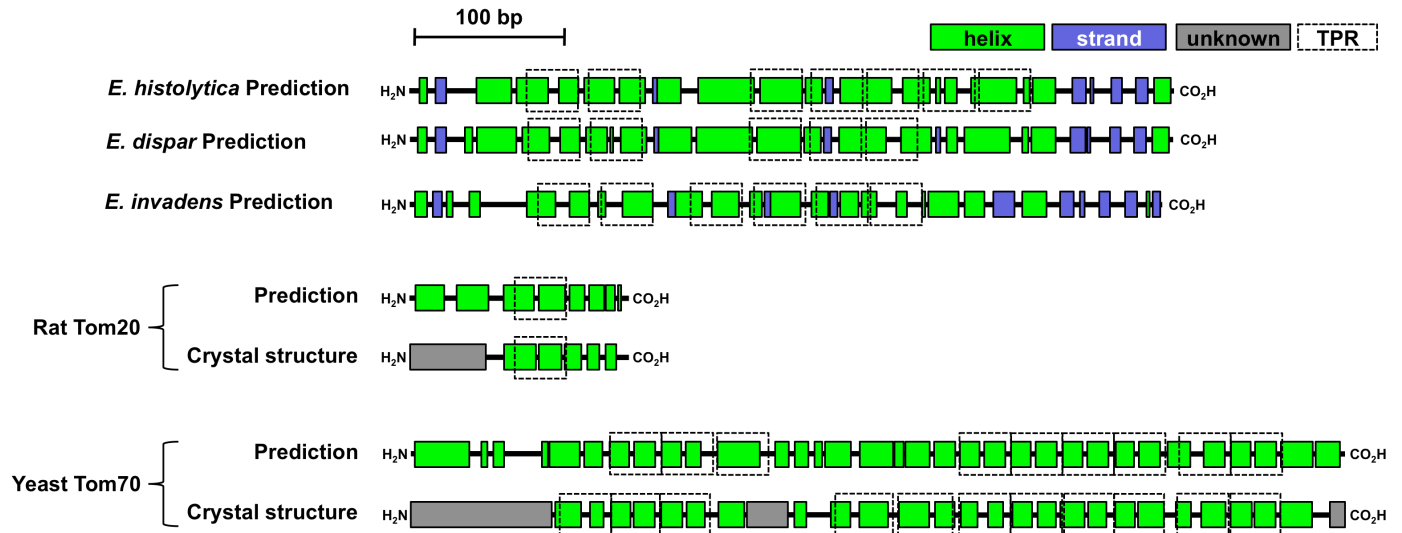

**Supplementary Figure S6: The secondary structure of *Entamoeba* Tom60s and mitochondrial receptors.**

The secondary structure of *Entamoeba* Tom60s, rat Tom20 (NCBI ID: Q62760), and yeast Tom70 (NCBI ID: NP\_014278) are predicted by PSIPRED. Crystal structure IDs of rat Tom20 and yeast Tom70 are 1OM2<sup>2</sup> and 2GW1<sup>3</sup> in Protein data bank, respectively. Green and blue boxes indicate putative  $\alpha$ -helices and  $\beta$ -strands predicted by PSIPRED, respectively. Gray boxes on rat Tom20 and yeast Tom70 based on crystal structure indicate unknown regions where the crystal structure is not solved. Dashed boxes indicate TPRs predicted by the TPRpred and the crystal structure<sup>2,3</sup>. Note that the fourth TPR of *E. histolytica* and *E. dispar* Tom60 (also the fourth and fifth TPRs of *E. invadens* Tom60), predicted by TPRpred, contain a  $\beta$ -strand by PSIPRED. In addition, the third TPR of *E. invadens* Tom60 is undetectable in *E. histolytica* and *E. dispar* Tom60. Therefore, the presence and absence of these putative TPRs need to be further verified.



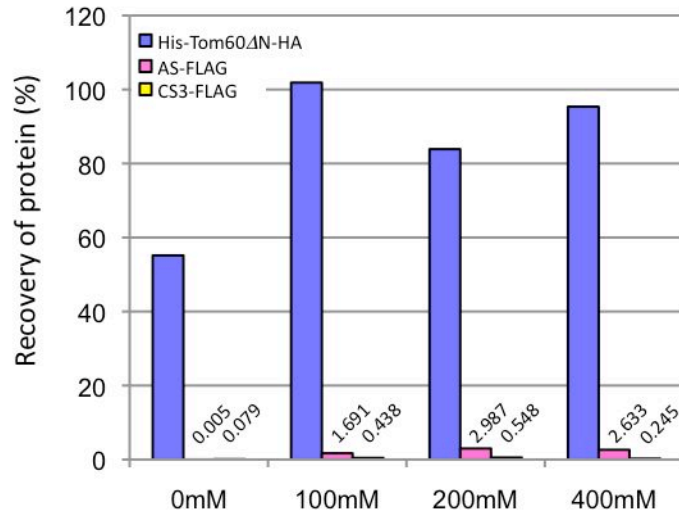

**Supplementary Figure S7: *In vitro* binding of His-Tom60 $\Delta$ N-HA to the mitochondrial matrix protein.** The recovery efficiency of His-Tom60 $\Delta$ N-HA, AS-FLAG, and CS3-FLAG in the *in vitro* binding assay performed at indicated KCl concentrations is shown. Recombinant AS-FLAG and CS3-FLAG was mixed with or without His-Tom60 $\Delta$ N-HA in the presence of 0-400mM KCl, and pulled down with Nickel NTA resin. The bound protein was eluted with imidazole. Vertical and horizontal axes indicate the recovery of proteins (%) and the KCl concentrations, respectively.

## Supplementary Methods

**Immunofluorescence assay and immunoelectron microscopy:** Immunofluorescence assay<sup>1</sup> and Immunoelectron microscopy<sup>4,5</sup> were performed as previously described.

**Percoll gradient centrifugation:** Mechanical homogenization and fractionation on two series of Percoll gradient ultracentrifugation of  $8 \times 10^6$  trophozoites were performed as previously described<sup>1</sup>. Briefly, cells were washed three times by 2% glucose/PBS. After resuspended in the lysis buffer (10mM MOPS-KOH (pH7.2)/250mM sucrose/protease inhibitors), cells were disrupted mechanically by a Dounce homogenizer. After unbroken cells were removed by centrifugation at  $5,000 \times g$  for 10 min, the supernatant was centrifuged on Percoll gradient.

**Immunoblot analysis:** Immunoblot analysis was performed with the Immobilon<sup>®</sup>-P membrane, anti-HA mouse monoclonal antibody (16B12; COVANCE, Berkeley, CA), alkaline phosphatase-conjugated anti-mouse IgG antibody (Cell Signaling Technology Beverly, MA), and CSPD (Roche Applied Science).

**In vitro binding assay:** Approximately 100 nmol of AS-FLAG, CS3-FLAG, or CS3-FLAG-EEVD was incubated with or without 50 nmol of His<sub>6</sub>-Tom60 $\Delta$ N-HA in the assay buffer (10mM HEPES-NaOH, pH7.5) containing HisLink<sup>TH</sup> Protein Purification Resin (Promega, Madison, WI), 0-400 mM KCl, and 50 mM imidazole at 35.5°C for 1.5 h. The mixture was transferred into a microspin column, and resins were washed three times with the assay buffer supplemented with KCl and imidazole. The proteins bound to His<sub>6</sub>-Tom60 $\Delta$ N-HA were co-eluted with the assay buffer containing 500mM imidazole. Approximately 40% of the eluted samples and 1.3 and 2.5 pmol of standard proteins were subjected to SDS-PAGE and immunoblot analyses with anti-HA and anti-FLAG antibodies. The relative amounts of proteins were quantified by the Analysis Toolbox in the ImageQuant TL software (GE Healthcare). Briefly, the protein amounts were calculated by subtracting the intensity of the band in the pull-down samples without His-Tom60 $\Delta$ N-HA from that with His-Tom60 $\Delta$ N-HA.

**Phylogenetic analysis:** The Bootstrap probability by the maximum likelihood method was calculated as previously described<sup>6</sup>. Briefly, the TPRs were identified and extracted from representative TPR-containing proteins including 23 yeast proteins (such as Tom20, Tom70, and Stilp) using the TPRpred program (<http://toolkit.tuebingen.mpg.de/tpred>). The TPRs were also extracted from 28 putative TPR-proteins including Tom60 from *E. histolytica*, *E. dispar*, and *E. invades*, 36 proteins from *Dictyostelium discoideum*, *Homo sapiens* Tom34, and *Arabidopsis thaliana* Toc64. Data sets to reconstruct individual maximum likelihood trees were prepared as follows: Set 1 (yeast TPRs and TPRs from *Homo sapiens* Tom34, *Arabidopsis thaliana* Toc64, and *Entamoeba* Tom60s; Supplementary Table S2A); Set 2 (*Dictyostelium discoideum* TPRs and TPRs from *Entamoeba* Tom60s; Supplementary Table S3A); and Set 3 (*E. histolytica* TPRs including TPRs from *Entamoeba* Tom60s; Supplementary Table S4A).

## References for Supplementary Methods

1. Mi-ichi, F., Yousuf, M. A., Nakada-Tsukui, K. & Nozaki, T. Mitosomes in *Entamoeba histolytica* contain a sulfate activation pathway. *Proc Natl Acad Sci USA*. **106**, 21731-21736 (2009) .
2. Abe, Y. *et al.* Structural basis of presequence recognition by the mitochondrial protein import receptor Tom20. *Cell*. **100**, 551-560 (2000).
3. Wu, Y., & Sha, B. Crystal structure of yeast mitochondrial outer membrane translocon member Tom70p. *Nat Struct Mol Biol*. **13**, 589-593 (2006).
4. Mi-ichi, F. *et al.* Sulfate activation in mitosomes plays an important role in the proliferation of *Entamoeba histolytica*. *PLoS Negl Trop Dis*. **5**, e1263, doi: 10.1371/journal.pntd.0001263 (2011).
5. Baba, M. Electron Microscopy in Yeast . *Methods Enzymol*. **451**, 133-149 (2008).
6. Makiuchi, T. *et al.* Compartmentalization of a glycolytic enzyme in *Diplonema*, a non-kinetoplastid euglenozoan. *Protist*. **162**, 482-489 (2011).

**Supplementary Table S1 (1 of 5 pages): Amino acid sequences of polypeptides that were detected exclusively from the 60kD band of immunoprecipitated sample (A), or the 600kD band of organelle fraction solubilized by digitonin (B), but not from corresponding controls, identified by liquid chromatography-tandem mass spectrometry.**

| Sample                                      | Annotation                  | Protein ID | M.W.   | Detected polypeptide | Mr (expt) | Mr (calc) |
|---------------------------------------------|-----------------------------|------------|--------|----------------------|-----------|-----------|
| A                                           | Tom60                       | XP_657124  | 60658  | IIGWLNNIYVIEK        | 1573.92   | 1573.89   |
| <hr style="border-top: 1px dashed black;"/> |                             |            |        |                      |           |           |
| B                                           | Tom60                       | XP_657124  | 60658  | IIGWLNNIYVIEK        | 1573.89   | 1573.89   |
|                                             |                             |            |        | AEIVGASIVAGIGFGVFK   | 1775.98   | 1775.98   |
|                                             | Tom40                       | XP_655014  | 32441  | GSFLSSFNLLSK         | 1298.69   | 1298.69   |
|                                             |                             |            |        | AIYGLLAFEHSSQDSSFK   | 1998.97   | 1998.97   |
|                                             | Glycogen debranching enzyme | XP_653608  | 167577 | TPEGQLR              | 849.43    | 849.43    |
|                                             |                             |            |        | GRNPEELK             | 941.49    | 941.49    |
|                                             |                             |            |        | HKEEYLK              | 945.49    | 945.49    |
|                                             |                             |            |        | EGSPEELAK            | 958.46    | 958.46    |
|                                             |                             |            |        | YLVGPLGMK            | 992.54    | 992.54    |
|                                             |                             |            |        | GNYSNPSTK            | 1053.47   | 1053.47   |
|                                             |                             |            |        | IMNELHER             | 1056.5    | 1056.5    |
|                                             |                             |            |        | VLHWINTSK            | 1096.6    | 1096.6    |
|                                             |                             |            |        | GYDELVPYR            | 1110.54   | 1110.53   |
|                                             |                             |            |        | LDSSHEGITR           | 1113.54   | 1113.54   |
|                                             |                             |            |        | MAPQGIEILK           | 1114.61   | 1114.61   |
|                                             |                             |            |        | KYLVGPLGMK           | 1120.63   | 1120.63   |
|                                             |                             |            |        | GKEGSPEELAK          | 1143.58   | 1143.58   |
|                                             |                             |            |        | IEESIQLR             | 1149.6    | 1149.6    |
|                                             |                             |            |        | EAVVWEDSLK           | 1174.59   | 1174.59   |
|                                             |                             |            |        | KIMNELHER            | 1184.6    | 1184.6    |
|                                             |                             |            |        | YVMVDGSYEK           | 1205.53   | 1205.53   |
|                                             |                             |            |        | GIYKDVGSTK           | 1229.63   | 1229.63   |
|                                             |                             |            |        | AIDVLNVDNYR          | 1290.66   | 1290.66   |

Supplementary Table S1, continued (2 of 5 pages)

| Sample | Annotation                                 | Protein ID | M.W.   | Detected polypeptide              | Mr (expt) | Mr (calc) |
|--------|--------------------------------------------|------------|--------|-----------------------------------|-----------|-----------|
| B      | Glycogen debranching enzyme                | XP_653608  | 167577 | ELQEIKEYPR                        | 1303.68   | 1303.68   |
|        |                                            |            |        | IIVMYVHTSFK                       | 1352.72   | 1352.72   |
|        |                                            |            |        | DGGDVEIEGLLMK                     | 1390.66   | 1390.66   |
|        |                                            |            |        | EGLIPEHIHIEK                      | 1413.76   | 1413.76   |
|        |                                            |            |        | GFEEVPLEGFIK                      | 1477.74   | 1477.75   |
|        |                                            |            |        | HGLIPNLLDGGDHSR                   | 1599.81   | 1599.81   |
|        |                                            |            |        | YIIPGEFWLYYVIDVNK                 | 2131.11   | 2131.1    |
|        |                                            |            |        | VSKEEHILPYYFEVIDGK                | 2165.1    | 2165.1    |
|        |                                            |            |        | FLFFGALTTGMLSSMENNEK              | 2268.04   | 2268.04   |
|        |                                            |            |        | IIVPYGTYPYEIEVETNYSNEHNFQGSK      | 3290.54   | 3290.54   |
|        | Multidrug resistance protein               | XP_651702  | 182959 | AMLIAIIPR                         | 1012.61   | 1012.61   |
|        |                                            |            |        | LLTEVLNAIK                        | 1112.68   | 1112.68   |
|        |                                            |            |        | KHDNDLYEK                         | 1160.55   | 1160.55   |
|        |                                            |            |        | TGFDIEEGNVEK                      | 1336.61   | 1336.61   |
|        |                                            |            |        | LLNDTMQGVTSMR                     | 1496.7    | 1496.7    |
|        |                                            |            |        | GMTMDVSDIDQLDIK                   | 1711.76   | 1711.76   |
|        |                                            |            |        | VLNSPMSFFQATPIGR                  | 1779.9    | 1779.9    |
|        |                                            |            |        | I I I D G V D T S T L A L E T L R | 1829.01   | 1829.01   |
|        |                                            |            |        | HTDEELIQALDDVNIR                  | 1879.93   | 1879.93   |
|        |                                            |            |        | SPLYNTFQETLLGLDTIR                | 2080.08   | 2080.08   |
|        | Cysteine protease binding family protein 1 | XP_655218  | 102930 | VYYILLSMK                         | 1144.62   | 1144.62   |
|        |                                            |            |        | GGWYAFLSVTEK                      | 1356.67   | 1356.67   |
|        |                                            |            |        | GYIDGDSYSNPYK                     | 1477.64   | 1477.64   |
|        |                                            |            |        | VSFYYDEPPINSK                     | 1557.73   | 1557.74   |
|        |                                            |            |        | YVGMWYTIVGDGGR                    | 1588.73   | 1588.73   |
|        | Hypothetical protein                       | XP_652282  | 37468  | TNNVILK                           | 800.48    | 800.48    |
|        |                                            |            |        | AEVAIPLIYNAK                      | 1300.74   | 1300.74   |
|        |                                            |            |        | GEDDYNKFDELTK                     | 1572.69   | 1572.69   |
|        |                                            |            |        | AYDLTFALYVNDVFK                   | 1777.89   | 1777.89   |

**Supplementary Table S1, continued (3 of 5 pages)**

| Sample | Annotation                                  | Protein ID | M.W.   | Detected polypeptide | Mr (expt) | Mr (calc) |
|--------|---------------------------------------------|------------|--------|----------------------|-----------|-----------|
| B      | Hypothetical protein                        | XP_651464  | 140450 | LVEYDSALR            | 1064.55   | 1064.55   |
|        |                                             |            |        | ALVEFIFWK            | 1151.64   | 1151.64   |
|        |                                             |            |        | LPQEFIEFLEER         | 1548.78   | 1548.78   |
|        |                                             |            |        | YVEPESIVEDDIK        | 1647.82   | 1647.82   |
|        | Hypothetical protein                        | XP_655913  | 109507 | SIVITGIFNLK          | 1203.72   | 1203.72   |
|        |                                             |            |        | ISTATSQFSTGVQFLQR    | 1869.96   | 1869.96   |
|        |                                             |            |        | LGLVLQMQDEPYALELIK   | 2088.12   | 2088.12   |
|        | Hypothetical protein                        | XP_651234  | 26833  | EIAQNAISK            | 972.52    | 972.52    |
|        |                                             |            |        | LDGYLLEYAK           | 1183.61   | 1183.61   |
|        |                                             |            |        | LSNIPASVDETVIK       | 1484.81   | 1484.81   |
|        |                                             |            |        | AADPNIVVPVHMR        | 1497.74   | 1497.74   |
|        | Gpi16 subunit, GPI transamidase component   | XP_653165  | 47693  | SNLPTILLVLR          | 1237.78   | 1237.78   |
|        |                                             |            |        | QSPDEFIADILLVR       | 1597.83   | 1597.84   |
|        |                                             |            |        | YYYVSKPSPDISDGLR     | 2046.99   | 2046.99   |
|        | Hypothetical protein                        | XP_650881  | 23244  | DIIQVSTADFDK         | 1350.67   | 1350.67   |
|        |                                             |            |        | SGNLWSSSIYIK         | 1353.69   | 1353.69   |
|        |                                             |            |        | GIAVLPLYSIFHK        | 1456.84   | 1456.84   |
|        | Vacular protein sorting 33A                 | BAE94829   | 76232  | LGRPIIIGSTHIR        | 1544.95   | 1544.95   |
|        |                                             | XP_649746  |        | DVGILNEIYSSLNTFQK    | 1939.99   | 1939.99   |
|        | Steroid 5-alpha reductase                   | XP_654922  | 34218  | GNTYTVETELTK         | 1354.66   | 1354.66   |
|        |                                             |            |        | TLQESGVTEDTPIEMK     | 1792.84   | 1792.84   |
|        | Gal/GalNAc lectin heavy subunit             | XP_650534  | 141442 | AIETVYNQMSSK         | 1385.65   | 1385.65   |
|        |                                             |            |        | NTVDNTVNNPQFTAK      | 1661.8    | 1661.8    |
|        |                                             |            |        | YAAKPPLTAAYFLEK      | 1681.91   | 1681.91   |
|        | Cysteine protease binding family protein 8  | XP_652899  | 101577 | YTIIFAMNAQR          | 1229.59   | 1229.59   |
|        |                                             |            |        | ALPIQELPFSR          | 1269.71   | 1269.71   |
|        |                                             |            |        | VQIPDVAYTIVTR        | 1459.8    | 1459.8    |
|        | Plasma membrane calcium-transporting ATPase | XP_653525  | 120546 | AADVGLAMGIR          | 1088.56   | 1088.56   |
|        |                                             | XP_651287  |        |                      |           |           |

**Supplementary Table S1, continued (4 of 5 pages)**

| Sample | Annotation                                  | Protein ID   | M.W.   | Detected polypeptide | Mr (expt) | Mr (calc) |
|--------|---------------------------------------------|--------------|--------|----------------------|-----------|-----------|
| B      | Hypothetical protein                        | XP_649559    | 35397  | YQQKDEFALLMK         | 1528.76   | 1528.76   |
|        | Cation-dependent mannose-6-phosphate        | XP_656907    | 24994  | IVLGSTSTESLELINDGK   | 1874.98   | 1874.98   |
|        | Histidine acid phosphatase                  | XP_651963    | 49636  | HFDEIYR              | 978.46    | 978.46    |
|        |                                             |              |        | TLQSAQAFLQTFYPLER    | 2012.04   | 2012.04   |
|        | Cysteine protease binding family protein 6  | XP_653036    | 100103 | GLWYTFVGDGR          | 1269.61   | 1269.61   |
|        |                                             |              |        | TEAVWYTFVSVEK        | 1458.7    | 1458.7    |
|        | Gaa1-like, GPI transamidase component       | XP_649469    | 68794  | LSLQEFGLR            | 1061.59   | 1061.59   |
|        |                                             |              |        | IISGFEPDIQPMVAGPTK   | 1964.99   | 1964.99   |
|        | Hypothetical protein                        | XP_654389    | 37476  | KHFGDYGNLN           | 1163.54   | 1163.54   |
|        | Proteasome alpha subunit                    | XP_653086    | 28386  | HVSDNAQVNTQK         | 1339.65   | 1339.65   |
|        |                                             |              |        | YGLRPYGVGLLVIGYDTKPR | 2236.24   | 2236.24   |
|        | Histidine acid phosphatase                  | XP_649718    | 50017  | LDAGWFLR             | 976.51    | 976.51    |
|        |                                             |              |        | DILSFQQMK            | 1124.55   | 1124.55   |
|        |                                             |              |        | KGLNQLATLGDK         | 1256.71   | 1256.71   |
|        | Small GTPase Rab11B                         | XP_652776    | 24056  | GALGALVVYDITK        | 1318.75   | 1318.75   |
|        | COPII-coated vesicle membrane protein P24   | XP_656857    | 22597  | LQQVSTYLNDK          | 1378.71   | 1378.71   |
|        |                                             |              |        | LQLEQIQPATEQEVK      | 1752.92   | 1752.92   |
|        | Hypothetical protein                        | XP_656399    | 68314  | LYDGYGFIEDLEK        | 1560.73   | 1560.73   |
|        | Glycerophosphoryl diester phosphodiesterase | XP_654143    | 45642  | VFVALGLR             | 873.54    | 873.54    |
|        |                                             |              |        | GITMTTLNELLDEFYGK    | 1959.95   | 1959.95   |
|        | Malic enzyme                                | XP_648590    | 54139  | EAADVAMQAIK          | 1161.57   | 1161.57   |
|        |                                             | XP_001913406 |        | GNEFVGVSDSTR         | 1236.61   | 1236.61   |
|        | 60S ribosomal protein L18a                  | XP_648709    | 20364  | VFAPNYVVAK           | 1106.61   | 1106.61   |
|        |                                             |              |        | IQLISITTVGDK         | 1286.74   | 1286.74   |
|        | Hypothetical protein                        | XP_648553    | 65525  | WTQGNEANVER          | 1302.6    | 1302.6    |
|        |                                             |              |        | GSDGYAIFHLLR         | 1347.69   | 1347.69   |
|        |                                             |              |        | ADTFHVLNFLQIDQLK     | 1901.01   | 1901      |
|        | Signal peptidase                            | XP_654079    | 38369  | EKLTESMDLK           | 1208.6    | 1208.6    |
|        |                                             |              |        | FFITIPFINSK          | 1325.74   | 1325.74   |

**Supplementary Table S1, continued (5 of 5 pages)**

| Sample | Annotation                                 | Protein ID   | M.W.   | Detected polypeptide | <i>Mr</i> (expt) | <i>Mr</i> (calc) |         |
|--------|--------------------------------------------|--------------|--------|----------------------|------------------|------------------|---------|
| B      | 60S ribosomal protein L7                   | XP_649035    | 26131  | LVDPYVTYGYPTLETVQK   | 2085.07          | 2085.07          |         |
|        |                                            | XP_650340    |        |                      |                  |                  |         |
|        |                                            | XP_653065    |        |                      |                  |                  |         |
|        |                                            | XP_656887    |        |                      |                  |                  |         |
|        | Hypothetical protein                       | XP_655238    | 112544 | ILDLFYSYIR           | 1138.64          | 1138.64          |         |
|        |                                            |              |        | EIPADGLALPTK         | 1273.69          | 1273.69          |         |
|        | Hypothetical protein                       | XP_001913453 | 45179  | IAAPFFDYSHLDAAK      | 1664.82          | 1664.82          |         |
|        |                                            |              |        | KAEEGHETKPGQSHFK     | 1808.88          | 1808.88          |         |
|        | beta-keto acyl reductase                   | XP_649970    | 36899  | EGFNLIVIAIR          | 1130.65          | 1130.64          |         |
|        | ARP2/3 complex 16 kDa subunit              | XP_652420    | 15050  | GEEAPVDYSAVVEK       | 1604.76          | 1604.76          |         |
|        | Nucleotide-sugar transporter               | XP_001913453 | 45836  | QPSVSNEEK            | 1016.48          | 1016.48          |         |
|        | Hypothetical protein                       | XP_653391    | 19648  | VLDLGLLEEILK         | 1240.73          | 1240.73          |         |
|        |                                            | XP_656635    |        |                      |                  |                  |         |
|        | Hypothetical protein                       | XP_653235    | 25847  | LSDQITLFTSPFR        | 1523.8           | 1523.8           |         |
|        | Hypothetical protein                       | XP_655479    | 73327  | SPISYGLATVQK         | 1262.69          | 1262.69          |         |
|        | 60S ribosomal protein L13                  | XP_649667    | 33280  | AFDAVAHLR            | 998.53           | 998.53           |         |
|        |                                            | XP_656471    |        |                      |                  |                  |         |
|        | Signal peptidase                           | XP_653142    | 21107  | GDNNPVDDR            | 1000.42          | 1000.42          |         |
|        | Hypothetical protein                       | XP_650421    | 28815  | LLSDETYETIAASPNR     | 1778.87          | 1778.87          |         |
|        |                                            |              |        |                      | VSVDIHPSSPLK     | 1277.7           | 1277.7  |
|        |                                            |              |        |                      | IYAGFIVPSVNDR    | 1449.76          | 1449.76 |
|        | Hypothetical protein                       | XP_650004    | 21783  | GEAIPAQYQVK          | 1202.63          | 1202.63          |         |
|        | Hypothetical protein                       | XP_657536    | 30964  | AQQEATILQK           | 1128.61          | 1128.61          |         |
|        | Hypothetical protein                       | XP_654842    | 23448  | SIPIIYLLISLYNPSK     | 1719.98          | 1719.98          |         |
|        | Galactose-inhibitable lectin small subunit | XP_001913520 | 31550  | VVVQEIIQR            | 1082.64          | 1082.64          |         |
|        | Hypothetical protein                       | XP_654584    | 22249  | FIVSTYQSGK           | 1185.6           | 1185.6           |         |

M.W. indicates the molecular weight (dalton). *Mr* (expt) and *Mr* (calc) denote the experimentally determined and calculated molecular masses, respectively. Proteins in bold were previously detected in the mitochondrial proteome<sup>1</sup>. Delta values (experimental minus calculated) of less than  $\pm 0.03$  are considered specific.



Supplementary Table. S5 (1 of 2 pages): List of primers.

| Described section of Method                                                                | Name            | Sequence                                                   | Derectin                                           | Mention                                 |                                     |  |  |
|--------------------------------------------------------------------------------------------|-----------------|------------------------------------------------------------|----------------------------------------------------|-----------------------------------------|-------------------------------------|--|--|
|                                                                                            |                 |                                                            |                                                    | Underline                               | double-underline                    |  |  |
| RNAs and gDNAs                                                                             | Primer-1        | 5'- AAAATGAACAATTTATTCA-3'                                 | antisense                                          |                                         |                                     |  |  |
| Cloning of <i>Tom40</i> and <i>Tom60</i> genes for the expression in <i>E. histolytica</i> | Primer-2        | 5'-<br>GCAAGATCTATGGAGGGATTGTGGATCC<br>-3'                 | sense                                              | <u>Bgl II restriction site</u>          |                                     |  |  |
|                                                                                            | Primer-3        | 5'-<br>GGAAGATCTACGAAAGATTTGAATAGAAG<br>CACC-3'            | antisense                                          | <u>Bgl II restriction site</u>          |                                     |  |  |
|                                                                                            | Primer-4        | 5'-<br>GTTGAGATCTATGCAGAGATAGTAGGTG<br>CATCAATTG-3'        | sense                                              | <u>Bgl II restriction site</u>          |                                     |  |  |
|                                                                                            | Primer-5        | 5'-<br>GTTGAGATCTATTAAGATAAAAAAATTGAA<br>GATGTTTAAAGATG-3' | antisense                                          | <u>Bgl II restriction site</u>          |                                     |  |  |
|                                                                                            | Primer-6        | 5'-<br>GCGGCCCTCTAGAAAGATAAATTAATTAC-<br>3'                | sense                                              |                                         | The sequencow for In-Fusion® system |  |  |
|                                                                                            | Primer-7        | 5'-<br>AAGCTGGGGATCCAACCGTATTGTCTTC<br>-3'                 | antisense                                          |                                         | The sequencow for In-Fusion® system |  |  |
|                                                                                            | Genes silencing | Primer-8                                                   | 5'-<br>ATCCAGGCCATGGAGGGATTGTGGATC<br>C-3'         | sense                                   | <u>Stu I restriction site</u>       |  |  |
|                                                                                            |                 | Primer-9                                                   | 5'-<br>AGCGAGCTCCATATCTCATTCCAAAACA<br>C-3'        | antisense                               | <u>Sac I restriction site</u>       |  |  |
|                                                                                            |                 | Primer-10                                                  | 5'-<br>ATCCAGGCCATGGCAGAGATAGAGT<br>GCATCAATTG-3'  | sense                                   | <u>Stu I restriction site</u>       |  |  |
|                                                                                            |                 | Primer-11                                                  | 5'-<br>AGCGAGCTCCTCTTTGAGAAATCTAAT<br>TGATGCTAG-3' | antisense                               | <u>Sac I restriction site</u>       |  |  |
|                                                                                            |                 | qRT-PCR                                                    | Primer-12                                          | 5'-CATCTCAATACCTTACTTATGGCTGC-3'        | sense                               |  |  |
|                                                                                            |                 |                                                            | Primer-13                                          | 5'-GAAAGATTTGAAATAGAAAGCACCCCAAG-<br>3' | antisense                           |  |  |
|                                                                                            |                 |                                                            | Primer-14                                          | 5'-GAAAGAGAAACGAAATAATGGTTGG-<br>3'     | sense                               |  |  |
|                                                                                            |                 |                                                            | Primer-15                                          | 5'-CTATAATGTCTCTTTATTCTCTACTTC-<br>3'   | antisense                           |  |  |
|                                                                                            |                 |                                                            | Primer-16                                          | 5'-<br>CGAATAATTGCAAGAAATGCAGGAATTG-3'  | sense                               |  |  |

Supplementary Table. S5 (2 of 2 pages): List of primers.

| Described section of Method | Name                               | Sequence                              | Derectin                            | Mention   |                                                                        |                                                                        |
|-----------------------------|------------------------------------|---------------------------------------|-------------------------------------|-----------|------------------------------------------------------------------------|------------------------------------------------------------------------|
|                             |                                    |                                       |                                     | Underline | double-underline                                                       |                                                                        |
| qRT-PCR                     | Primer-17                          | 5'-GGTTTCATCAGTTTATTAAATGCTTCTGAC-3'  | antisense                           |           |                                                                        |                                                                        |
|                             | Primer-18                          | 5'-CCTATGAAAAATCGAATGGACATTCATATGC-3' | sense                               |           |                                                                        |                                                                        |
|                             | Primer-19                          | 5'-CATCACCAGTAGCAAACCTTTTGTACTTG-3'   | antisense                           |           |                                                                        |                                                                        |
|                             | Primer-20                          | 5'-GCCCAAATTCACCATATCGTGAATTAG-3'     | sense                               |           |                                                                        |                                                                        |
|                             | Primer-21                          | 5'-GCACATTGATCAACAGACTTACCAGCAG-3'    | antisense                           |           |                                                                        |                                                                        |
|                             | Primer-22                          | 5'-GATCCTCTTGCTCAAACCATTACATCTG-3'    | sense                               |           |                                                                        |                                                                        |
|                             | Primer-23                          | 5'-GCTAACGCCAATTTTGATACTTCTTTG-3'     | antisense                           |           |                                                                        |                                                                        |
|                             | Primer-24                          | 5'-GATCCAACATCCTAAACAACA-3'           | sense                               |           |                                                                        |                                                                        |
|                             | Primer-25                          | 5'-TCAAATTTTCTGACCCCGTCTTC-3'         | antisense                           |           |                                                                        |                                                                        |
|                             | Primer-26                          | 5'-AAGGATCCCAACCCGATCAAAACAGACAA-3'   | sense                               |           | <u>BamH I</u> restriction site                                         |                                                                        |
|                             | Primer-27                          | 5'-AACTGCAGGAGTTCAAACTCGAGTTACCC-3'   | antisense                           |           | <u>Pst I</u> restriction site                                          |                                                                        |
|                             | Primer-28                          | 5'-AAGGATCCGAAAACCTGTATTTTCAGGGA-3'   | sense                               |           | for addition of the Tobacco Etch Virus (TEV) protease recognition site |                                                                        |
|                             | Primer-29                          | 5'-AACTGCAGTTACTATCGTCGTCCCTA-3'      | antisense                           |           | for addition of the FLAG epitope tag                                   |                                                                        |
|                             | Primer-30                          | 5'-AAGGATCCGAAAACCTGTATTTTCAGGGA-3'   | sense                               |           | for addition of the TEV protease recognition site                      |                                                                        |
|                             | Primer-31                          | 5'-AATAGTCAAGTAATAATGAGTCTAATAC-3'    | antisense                           |           | for addition of the FLAG epitope tag                                   |                                                                        |
|                             | Production of recombinant proteins | Primer-26                             | 5'-AAGGATCCCAACCCGATCAAAACAGACAA-3' | sense     | <u>BamH I</u> restriction site                                         |                                                                        |
|                             |                                    | Primer-27                             | 5'-AACTGCAGGAGTTCAAACTCGAGTTACCC-3' | antisense | <u>Pst I</u> restriction site                                          |                                                                        |
|                             |                                    | Primer-28                             | 5'-AAGGATCCGAAAACCTGTATTTTCAGGGA-3' | sense     |                                                                        | for addition of the Tobacco Etch Virus (TEV) protease recognition site |
|                             |                                    | Primer-29                             | 5'-AACTGCAGTTACTATCGTCGTCCCTA-3'    | antisense |                                                                        | for addition of the FLAG epitope tag                                   |
|                             |                                    | Primer-30                             | 5'-AAGGATCCGAAAACCTGTATTTTCAGGGA-3' | sense     |                                                                        | for addition of the TEV protease recognition site                      |
|                             |                                    | Primer-31                             | 5'-AATAGTCAAGTAATAATGAGTCTAATAC-3'  | antisense |                                                                        | for addition of the FLAG epitope tag                                   |
|                             |                                    | Primer-26                             | 5'-AAGGATCCCAACCCGATCAAAACAGACAA-3' | sense     | <u>BamH I</u> restriction site                                         |                                                                        |
|                             |                                    | Primer-27                             | 5'-AACTGCAGGAGTTCAAACTCGAGTTACCC-3' | antisense | <u>Pst I</u> restriction site                                          |                                                                        |
|                             |                                    | Primer-28                             | 5'-AAGGATCCGAAAACCTGTATTTTCAGGGA-3' | sense     |                                                                        | for addition of the Tobacco Etch Virus (TEV) protease recognition site |
|                             |                                    | Primer-29                             | 5'-AACTGCAGTTACTATCGTCGTCCCTA-3'    | antisense |                                                                        | for addition of the FLAG epitope tag                                   |
